# Supplementary material
Source: PubMed Central journal article supplement (PMC3255894)

**Figure S1. (A) Specificity of the ATR-P-S428 antibody for ATR.**

Immunoprecipitation and Western analysis of MO59J Fus1 cells at 24 h after infection with AAV2 (MOI 2000), HSV-1 (MOI 1.5), AAV2 (MOI 2000) and HSV-1 (MOI 1.5), or mock-infection (m). Lysates were processed for immunoprecipitation and Western analysis using the indicated antibodies.

**(B) No activation of the ATR target Chk1.** Western analysis of AT22 IJE-T cells at the indicated hours post HSV-1 infection. Cells were infected with HSV-1 (MOI 1.5), AAV2 (MOI 2000) 24h prior to HSV-1 (MOI 1.5), or co-infected with AAV2 (MOI2000) and HSV-1 (MOI 1.5). As positive control for the activation of Chk1, cells were treated with HU (3mM) for 18 h. Cell lysates were subjected to Western analysis and analyzed with the indicated antibodies.

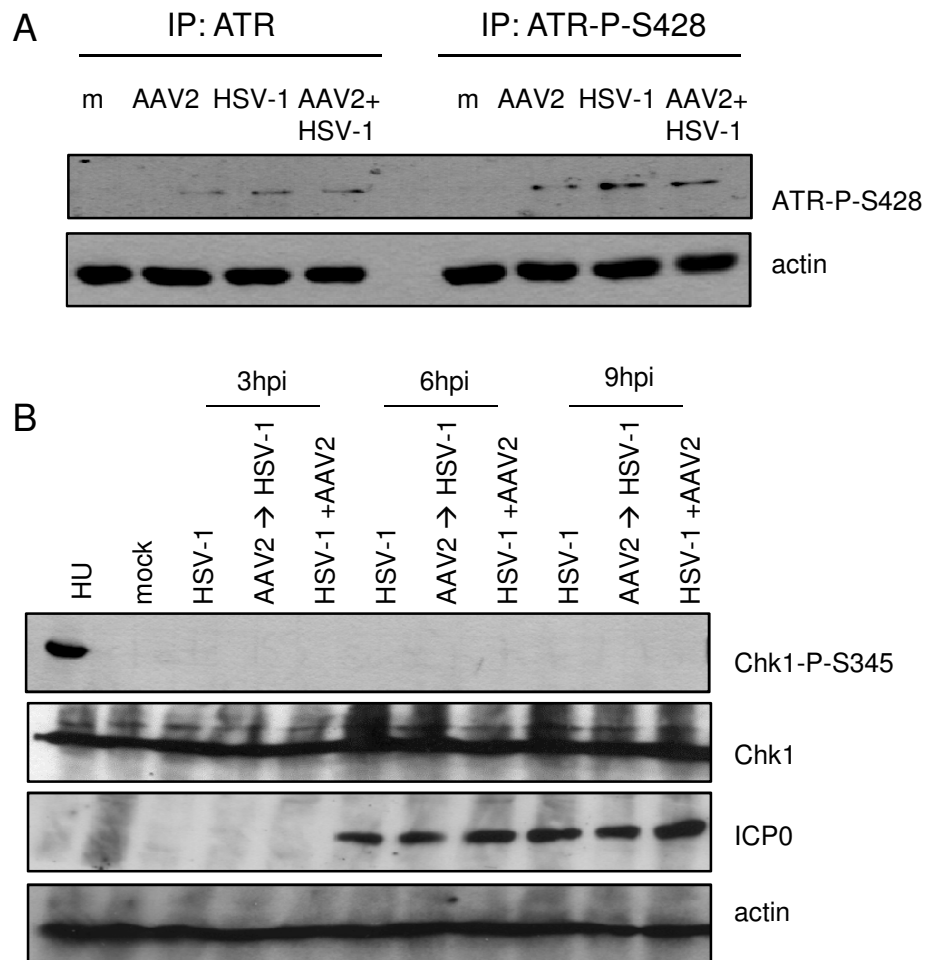

Supplement: supp_86.1.143_FigS1.pdf [file supp_86.1.143_FigS1.pdf]
